# Supplementary material for: T-complex protein 1 subunit zeta-2 (CCT6B) deficiency induces murine teratospermia
Source: PeerJ. 2021 Jun 1;9:e11545. doi: 10.7717/peerj.11545 (PMC8176918; doi:10.7717/peerj.11545)
Supplement: Supplemental Information 4 [file peerj-09-11545-s004.xlsx]

## Sheet: Sheet1
Table S1. List of primer sequences
Primer Name	Sequence (5' to 3')
Cct6b-/- Genotyping
Cct6b_F	GCATACTTACTACTCGGAGAGCAT
Cct6b_R	CAGAGATAAGAAGGTGGCATTGGA
Cct6b RT-PCR
Cct6b_qPCR_F	TAAGAGATGGACTCCGTGCG
Cct6b_qPCR_R	CTGAGCAAGAACCTTCGGGA
18S_qPCR_F	CGGACAGGATTGACAGATTGATAG
18S_qPCR_R	ATGCCAGAGTCTCGTTCGTTAT
Cct family RT_PCR
Cct1_qPCR_F	CTTTTGGGCCAGTTGGCTTG
Cct1_qPCR_R	TCCGCTGCAATGATTACCACT
Cct2_qPCR_F	TTGCCATTCAGACCAGTGGG
Cct2_qPCR_R	CGATAAACGACGACAGGCGA
Cct3_qPCR_F	CTCGTGCTCAGTCAGAACACA
Cct3_qPCR_R	ATTGGGTCCAAAAGCATCTTCA
Cct4_qPCR_F	AGGGAGACCGTTACTCCACA
Cct4_qPCR_R	TAGCATCAGCAACCGCTTTG
Cct5_qPCR_F	GAGCGCTCGTTCTAGTTCGT
Cct5_qPCR_R	CATCTTGTCCAGCCCGTTTG
Cct6a_qPCR_F	GATCTGAGCACAGGTGAGCC
Cct6a_qPCR_R	CAGGCCTCAACCCTTCAGAG
Cct7_qPCR_F	CTCTCCCGGGCTAACGTCTC
Cct7_qPCR_R	GGATAACTGGTGTGGGCATCA
Cct8_qPCR_F	TCAAGGATGGAGCCAAACATTTC
Cct8_qPCR_R	GGAGGTTCGAAGCAGAGAGG
