# Supplementary material for: T-complex protein 1 subunit zeta-2 (CCT6B) deficiency induces murine teratospermia
Source: PeerJ. 2021 Jun 1;9:e11545. doi: 10.7717/peerj.11545 (PMC8176918; doi:10.7717/peerj.11545)
Supplement: Supplemental Information 5 [file peerj-09-11545-s005.xlsx]

## Sheet: sgRev
Table S2. List of primer sequences for amplifying Cas9/sgRNA targeted fragment
Primer Name	Sequence (5' to 3')
OT1-F	GCTGTCCTGGAACTCACTCT
OT2-F	CCGAGGAGAATCTGAGTGTAATCT
OT3-F	TTCAGAAGAGCAGTCAGTG
OT4-F	CAGGTGCCATAGGAGGATGTTG
OT5-F	GAGAGCCAACACTGCCAGTAAGC
OT6-F	GCAGACTAAGTTCCTAAGTTCAG
OT7-F	CGTGCTCGCCAGTAGACAT
OT8-F	CGTGGCACAGAATACAAGGACAAC
OT9-F	AACTCTTTGTCCTTTGGCTTCAG
OT10-F	GCATAAACCCAGAGCGGAAGG
OT11-F	CCGTGGTGATAGGCTTGATGAG
OT12-F	GCCTGCTCTCTTATAGAACCCAAG
OT13-F	GCACGCATCCATTCATTCCTCAGT
OT14-F	GCAGATTGCCGACCTCTGATGG
OT25-F	TCCACAACCTCAACATAATG
OT26-F	CCTCAGGCTCCTCTCCATT
OT27-F	ATCTTGGCTTCCGCACAGT
OT28-F	AACCTCTGAACCTCTAAG
OT1-R	CCACTTCTGTCTTAGGCACTG
OT2-R	GGAAGGAGGAAGGAGGTAACAG
OT3-R	GCAAGCCAGTAAGGAACA
OT4-R	AGAAGTCTACAGCCACTCTCAGA
OT5-R	AGATGGACCTCACTCAGCATGACA
OT6-R	CCTTCCTTCCTTCCTTCCATT
OT7-R	TTCTTCCTCTTCTTCTTCTCTTCCT
OT8-R	GGACTTGACGGATGAGGCTACC
OT9-R	CATCCTACCTCTCACTCTCATCAG
OT10-R	TGTTCAGCATAGCATACAGTAGGC
OT11-R	ATGGACTGTGGGACTGTGGAA
OT12-R	CCATAGAAGGAGTTACAGAGACAA
OT13-R	GTTGGCTTGTGGCTTGGTAGTTCT
OT14-R	TCCTGACCTGCTTACCTCTGACTC
OT25-R	GGCACAGTCAATAGAACAAT
OT26-R	GGCTTCTGTCCATTGTTGTG
OT27-R	GCTATCAACTCTCGTCTTGTAACT
OT28-R	ACATGATCCTCCTACCTA

## Sheet: sgFor
Table S2. List of primer sequences for amplifying Cas9/sgRNA targeted fragment
Primer Name	Sequence (5' to 3')
OT15-F	GGAGCACTACTCATTGTCCTTAGA
OT16-F	GGTCTGCCTGTATCTGCCTTCA
OT17-F	ACGCCTAGCATTCCTGAGTCTCTA
OT18-F	ACCTTGGCTGTCCTGGAACTCACT
OT19-F	CTGGGCTTCTTCCTTAGTGTGTCT
OT20-F	CCCTTTCAGAGACAGCCCAGAG
OT21-F	TGCGTCTCTCACACCCGAACATC
OT22-F	TGGAGTGCTGTATGCTTGTTGAGT
OT23-F	TGTAAGAAATCAATAGCCAGGCAGTG
OT24-F	TCACATACTGCTGTCGCTTCTG
OT29-F	GTGGTCTAGTCAAGAACAA
OT30-F	CCATTGGCACAGACAGTAACATTA
OT31-F	CTAGTGCTGACAGACA
OT32-F	AACCAGTGCTGTCAGTCAGAGAA
OT33-F	TTAGTGTCATAGACCTTTCCCTCT
OT34-F	GGAATACAGCCAATAATGTC
OT35-F	GAGTGTCCTTCACATTGGTCTT
OT15-R	GGCTATCTCTAGTCCATTGTTCCT
OT16-R	GCCTGTTCCTTCATGTTCTCCTTC
OT17-R	CCACATGGCAGCTCCTATCTGTAA
OT18-R	GCCTACTATTGACTCTGTCCTATGGT
OT19-R	GGCTAGAGCGATGTCTCAGTCAT
OT20-R	CTAGAGCCACTAACTTGCCAACAG
OT21-R	GGATAGGTAACTGGCTGGCACAGG
OT22-R	AACAGATGCTGGCTTACAGGTCAG
OT23-R	TTGTAGTGCTTCTGAGTCTCTTGCTA
OT24-R	TCTGTCTCTTCCTGACTGTTCTCT
OT29-R	ACACATACCTGGCTTATAC
OT30-R	GCAGTGATGAAGTCAAGTCCTAAG
OT31-R	GCTATCCAGAGACCATA
OT32-R	GCTCTAGCTGCTGATAGTGTCTGT
OT33-R	ACTGATGGCTTTACTTGCTTGT
OT34-R	CAGGAGTGTGAAGATACC
OT35-R	CACATAGCCTGCCTAAGTTCTG
