# Supplementary material for: T-complex protein 1 subunit zeta-2 (CCT6B) deficiency induces murine teratospermia
Source: PeerJ. 2021 Jun 1;9:e11545. doi: 10.7717/peerj.11545 (PMC8176918; doi:10.7717/peerj.11545)
Supplement: Supplemental Information 6 [file peerj-09-11545-s006.xlsx]

## Sheet: Sheet1
Table 3. List of predicted off-target sites
	sgRev	guideSeq	start	end	offtargetSeq	mismatchPos
OT1	chr8	ATGTTCTAGCCACATCCAAGAGG	87629610	87630632	AGTTTCTAGCCACATCCAAGGGG	.**.................
OT2	chr17	ATGTTCTAGCCACATCCAAGAGG	11858377	11859399	TGGTGCGAGCCACATCCAAGTGG	**..*.*.............
OT3	chr1	ATGTTCTAGCCACATCCAAGAGG	82161616	82162638	AGATTCTAGTCAAATCCAAGAGG	.**......*..*.......
OT4	chr16	ATGTTCTAGCCACATCCAAGAGG	5757076	5758098	ATGTACTAAGCACATCCAAGGGG	....*...**..........
OT5	chr9	ATGTTCTAGCCACATCCAAGAGG	40613152	40614174	ATTTTCTACCCAAATCCAAGAGG	..*.....*...*.......
OT6	chrX	ATGTTCTAGCCACATCCAAGAGG	48125945	48126967	AAGTTCTTGATACATCCAAGAGG	.*.....*.**.........
OT7	chr10	ATGTTCTAGCCACATCCAAGAGG	98647560	98648582	TTGTGCTTGCTACATCCAAGAGG	*...*..*..*.........
OT8	chr15	ATGTTCTAGCCACATCCAAGAGG	74255357	74256379	ATGTTATAGCCACATCCAAAAGA	.....*.............*
OT9	chr8	ATGTTCTAGCCACATCCAAGAGG	74661620	74662642	TTTTTCTAGACACATACAAGTGG	*.*......*.....*....
OT10	chr19	ATGTTCTAGCCACATCCAAGAGG	28370621	28371643	ATGTTATAGCCATATACATGTGG	.....*......*..*..*.
OT11	chr17	ATGTTCTAGCCACATCCAAGAGG	66979395	66980417	CTGTTCTAGAAACATCCATGGGG	*........**.......*.
OT12	chr12	ATGTTCTAGCCACATCCAAGAGG	116536959	116537981	AAATTTTAGCCACATCCTAGAGG	.**..*...........*..
OT13	chr10	ATGTTCTAGCCACATCCAAGAGG	85848862	85849884	AGGTTCTAGTAACATCAAAGTGG	.*.......**.....*...
OT14	chr10	ATGTTCTAGCCACATCCAAGAGG	86623257	86624279	AGGTTCTAGTAACATCAAAGTGG	.*.......**.....*...
0T25	chrX	ATGTTCTAGCCACATCCAAGAGG	122540449	122541471	CTGTTCTTCCAACATCCAAGAGG	*......**.*.........
OT26	chr15	ATGTTCTAGCCACATCCAAGAGG	49665657	49666679	ATGTACTAGCCAGATCCAACAGG	....*.......*......*
OT27	chr4	ATGTTCTAGCCACATCCAAGAGG	82186110	82187132	ATGTTACAGCAACATCCAAATGG	.....**...*........*
OT28	chr2	ATGTTCTAGCCACATCCAAGAGG	143842175	143843197	ATGTTCAAGCCACATACAGAAGG	......*........*..**
	sgFor	guideSeq	start	end	offtargetSeq	mismatchPos
OT15	chr19	GACGAAAGTTCATGCTGAACTGG	18175811	18176833	TGCCAAAGTTCATGCTGAAAGGG	**.*...............*
OT16	chr15	GACGAAAGTTCATGCTGAACTGG	55208271	55209293	GACGGAAGTTCATTCTGAACTGG	....*........*......
OT17	chr12	GACGAAAGTTCATGCTGAACTGG	80137376	80138398	GACAGAAGTTCATGCTGAACCAG	...**...............
OT18	chr1	GACGAAAGTTCATGCTGAACTGG	156276368	156277390	GAATAAAATTCATGCTGAAAGGG	..**...*...........*
OT19	chr3	GACGAAAGTTCATGCTGAACTGG	68274980	68276002	GAGGAAAGTTCAAGCTGAACTAG	..*.........*.......
OT20	chr5	GACGAAAGTTCATGCTGAACTGG	54418664	54419686	GAAGGAAGTTCATGCAAAACTGG	..*.*..........**...
OT21	chr18	GACGAAAGTTCATGCTGAACTGG	33267455	33268477	GCAGATAGTTCATGCAGAACAGG	.**..*.........*....
OT22	chr5	GACGAAAGTTCATGCTGAACTGG	55693626	55694648	GAAGGAAGATCATGCTGAAAGGG	..*.*...*..........*
OT23	chr12	GACGAAAGTTCATGCTGAACTGG	71152785	71153807	GAAGAAAGAACATGCTGGACCGG	..*.....**.......*..
OT24	chr9	GACGAAAGTTCATGCTGAACTGG	59372581	59373603	GAAGAAAGGTCATGCTGGACTGG	..*.....*........*..
OT29	chr6	GACGAAAGTTCATGCTGAACTGG	20520278	20521300	AACCAAAGAACATGCTGAACTGG	*..*....**..........
OT30	chr2	GACGAAAGTTCATGCTGAACTGG	67511161	67512183	GATGGAATTTCATGCTGAAAAGG	..*.*..*...........*
OT31	chr1	GACGAAAGTTCATGCTGAACTGG	162650400	162651422	GGAGAAAGTCCAGGCTGAACTGG	.**......*..*.......
OT32	chr11	GACGAAAGTTCATGCTGAACTGG	92792342	92793364	GAGTAAAGTACAGGCTGAACTGG	..**.....*..*.......
OT33	chrX	GACGAAAGTTCATGCTGAACTGG	77292535	77293557	GAGTAAAGTCCAGGCTGAACTGG	..**.....*..*.......
OT34	chr14	GACGAAAGTTCATGCTGAACTGG	57342590	57343612	GAAGGAAGATCATGCAGAACTGG	..*.*...*......*....
OT35	chr3	GACGAAAGTTCATGCTGAACTGG	13661718	13662740	GATGAAAGCTAATGCTAAACTGG	..*.....*.*.....*...
