# Supplementary material for: T-complex protein 1 subunit zeta-2 (CCT6B) deficiency induces murine teratospermia
Source: PeerJ. 2021 Jun 1;9:e11545. doi: 10.7717/peerj.11545 (PMC8176918; doi:10.7717/peerj.11545)
Supplement: Supplemental Information 7 [file peerj-09-11545-s007.xlsx]

## Sheet: Sheet1
	Cct6b-Ct	18s-Ct	△Ct	2^△Ct	average
heart	30.5409	7.16857	-23.3723	9.20933e-08	1.06809e-07
heart	30.422	7.27849	-23.1435	1.0792e-07
heart	31.798	9.23458	-22.5635	1.61332e-07
heart	31.3961	9.73565	-21.6604	3.01686e-07
heart	32.8922	9.83669	-23.0555	1.14709e-07
heart	31.3886	6.32391	-25.0646	2.84964e-08
heart	31.4945	6.43562	-25.0589	2.86109e-08
heart	31.9512	6.34823	-25.603	1.96218e-08
liver	28.8735	6.65457	-22.219	2.04846e-07	3.01749e-07
liver	28.5176	6.80944	-21.7081	2.91881e-07
liver	29.1119	8.54623	-20.5657	6.44341e-07
liver	29.619	8.45632	-21.1627	4.25994e-07
liver	30.5116	9.25034	-21.2613	3.97851e-07
liver	29.5682	7.10915	-22.4591	1.73437e-07
liver	29.5737	7.05268	-22.521	1.66154e-07
liver	30.2319	7.1092	-23.1227	1.09487e-07
spleen	31.1249	7.02843	-24.0964	5.57502e-08	1.23297e-07
spleen	31.7419	6.92748	-24.8144	3.38936e-08
spleen	31.7133	10.6084	-21.1049	4.43408e-07
spleen	33.8664	9.42004	-24.4464	4.37423e-08
spleen	32.1687	9.97318	-22.1955	2.08203e-07
spleen	31.7844	8.78206	-23.0024	1.19014e-07
spleen	32.2105	7.65239	-24.5581	4.04844e-08
spleen	32.3186	7.80932	-24.5093	4.18754e-08
lung	29.1554	7.3232	-21.8322	2.67831e-07	1.64454e-07
lung	29.4716	7.31183	-22.1598	2.13421e-07
lung	32.4137	10.3177	-22.096	2.23063e-07
lung	33.0678	10.0887	-22.9792	1.20944e-07
lung	32.5326	10.1528	-22.3797	1.83243e-07
lung	29.9654	6.8978	-23.0676	1.13755e-07
lung	29.9915	6.83332	-23.1582	1.06827e-07
lung	30.2787	6.81673	-23.4619	8.65479e-08
kidney	26.5895	7.69683	-18.8926	2.0547e-06	1.51614e-06
kidney	26.8649	7.51113	-19.3537	1.4926e-06
kidney	27.3821	7.86138	-19.5207	1.32948e-06
kidney	27.9019	8.75397	-19.148	1.72144e-06
kidney	26.8718	8.76911	-18.1027	3.5525e-06
kidney	27.1765	6.71588	-20.4606	6.93004e-07
kidney	27.3004	6.66403	-20.6364	6.13514e-07
kidney	27.1968	6.69155	-20.5053	6.71885e-07
brain	31.4876	7.4686	-24.019	5.88258e-08	1.15272e-07
brain	32.4204	7.55493	-24.8655	3.27148e-08
brain	31.7391	9.24725	-22.4919	1.69539e-07
brain	31.2397	9.39923	-21.8405	2.66296e-07
brain	31.0184	9.22512	-21.7933	2.75148e-07
brain	31.5078	7.09982	-24.408	4.4923e-08
brain	31.7207	7.21272	-24.508	4.19134e-08
brain	31.9874	7.12646	-24.861	3.28172e-08
muscle	30.1797	7.88237	-22.2973	1.9402e-07	2.2229e-07
muscle	30.0886	7.91239	-22.1762	2.11006e-07
muscle	31.0748	10.0114	-21.0634	4.56347e-07
muscle	32.9208	10.3399	-22.5809	1.59394e-07
muscle	32.3226	9.92028	-22.4023	1.80402e-07
muscle	31.8413	8.91431	-22.927	1.25394e-07
muscle	30.991	8.9417	-22.0493	2.30406e-07
muscle	31.1584	9.05126	-22.1072	2.21348e-07
fat	29.373	8.3678	-21.0052	4.75113e-07	5.49597e-07
fat	29.6172	8.29466	-21.3225	3.81318e-07
fat	28.9897	9.01117	-19.9785	9.67977e-07
fat	28.7254	9.13463	-19.5908	1.26643e-06
fat	29.0972	8.97952	-20.1177	8.78989e-07
fat	28.8834	6.14813	-22.7353	1.43221e-07
fat	28.843	6.20208	-22.641	1.52894e-07
fat	29.1165	6.25071	-22.8658	1.3083e-07
Stomach	31.6203	7.99604	-23.6243	7.73348e-08	5.02733e-08
Stomach	32.8535	8.23643	-24.6171	3.88607e-08
Stomach	32.9174	9.06152	-23.8558	6.5868e-08
Stomach	32.4022	8.40755	-23.9947	5.98251e-08
Stomach	32.1336	8.95839	-23.1752	1.05574e-07
Stomach	31.5391	5.5751	-25.964	1.52773e-08
Stomach	31.2269	5.73287	-25.494	2.11615e-08
Stomach	31.5151	5.81031	-25.7048	1.82847e-08
Gut	33.1504	7.61793	-25.5325	2.06047e-08	3.58518e-08
Gut	32.3888	7.60398	-24.7848	3.45963e-08
Gut	32.9583	9.15141	-23.8069	6.81393e-08
Gut	34.2276	9.45602	-24.7715	3.4916e-08
Gut	33.1495	9.56682	-23.5826	7.9601e-08
Gut	31.7163	6.52223	-25.1941	2.60516e-08
Gut	33.4804	6.49473	-26.9856	7.52515e-09
Gut	32.5686	6.61432	-25.9543	1.53805e-08
testis	18.2022	7.42277	-10.7794	0.000568944	0.00054379
testis	17.993	7.64475	-10.3483	0.000767115
testis	18.3775	8.10678	-10.2707	0.000809491
testis	18.5352	8.07997	-10.4553	0.000712287
testis	18.4309	8.02375	-10.4072	0.000736432
testis	18.9786	6.95419	-12.0245	0.000240037
testis	18.794	6.7665	-12.0276	0.000239523
testis	18.6619	6.8414	-11.8205	0.000276495
uterus	29.8584	7.24207	-22.6163	1.55526e-07	1.22292e-07
uterus	29.9724	7.16822	-22.8042	1.3654e-07
uterus	32.19	9.6997	-22.4903	1.6972e-07
uterus	31.7048	9.00687	-22.6979	1.46976e-07
uterus	32.654	9.67459	-22.9794	1.20921e-07
uterus	30.2504	7.14674	-23.1036	1.10947e-07
uterus	30.8093	7.04674	-23.7626	7.0267e-08
uterus	30.9865	7.16476	-23.8218	6.74416e-08
ovary	28.7943	7.27704	-21.5173	3.33154e-07	3.5722e-07
ovary	30.0389	7.40824	-22.6307	1.53991e-07
ovary	28.2662	7.68436	-20.5818	6.3716e-07
ovary	28.5535	7.63755	-20.9159	5.05451e-07
ovary	28.2198	7.53213	-20.6876	5.92106e-07
ovary	29.882	7.83013	-22.0519	2.3e-07
ovary	30.2128	7.86811	-22.3447	1.87752e-07
ovary	29.908	7.77981	-22.1282	2.18143e-07
