# Supplementary material for: T-complex protein 1 subunit zeta-2 (CCT6B) deficiency induces murine teratospermia
Source: PeerJ. 2021 Jun 1;9:e11545. doi: 10.7717/peerj.11545 (PMC8176918; doi:10.7717/peerj.11545)
Supplement: Supplemental Information 9 [file peerj-09-11545-s009.xlsx]

## Sheet: Sheet1
Testis	Cct6b-Ct	18s-Ct	△Ct	2^△Ct	average
Cct6b+/+1	18.2022	7.42277	-10.7794	0.000568944	0.00054379
Cct6b+/+1	17.993	7.64475	-10.3483	0.000767115
Cct6b+/+2	18.3775	8.10678	-10.2707	0.000809491
Cct6b+/+2	18.5352	8.07997	-10.4553	0.000712287
Cct6b+/+2	18.4309	8.02375	-10.4072	0.000736432
Cct6b+/+3	18.9786	6.95419	-12.0245	0.000240037
Cct6b+/+3	18.794	6.7665	-12.0276	0.000239523
Cct6b+/+3	18.6619	6.8414	-11.8205	0.000276495
Cct6b-/-1	20.6141	7.88428	-12.7298	0.00014721	0.000104236
Cct6b-/-1	20.5726	7.95408	-12.6185	0.000159023
Cct6b-/-2	21.9261	9.04471	-12.8814	0.000132532
Cct6b-/-2	21.8485	8.84897	-12.9995	0.00012211
Cct6b-/-2	21.7668	8.93977	-12.827	0.000137623
Cct6b-/-3	21.371	7.08212	-14.2889	4.99604e-05
Cct6b-/-3	21.3107	6.98542	-14.3253	4.87148e-05
Cct6b-/-3	21.2707	6.53729	-14.7334	3.67123e-05
