# Supplementary material for: T-complex protein 1 subunit zeta-2 (CCT6B) deficiency induces murine teratospermia
Source: PeerJ. 2021 Jun 1;9:e11545. doi: 10.7717/peerj.11545 (PMC8176918; doi:10.7717/peerj.11545)
Supplement: Supplemental Information 11 [file peerj-09-11545-s011.xlsx]

## Sheet: Sheet1
	Cct6b+/+♂× Cct6b+/+♀	Cct6b-/-♂× Cct6b+/+♀
	6	4
	4	3
	4	5
	3	5
	4	8
	6
Average	4.5	5
Sd	1.22474	1.87083
P-Value		0.606118
