# Supplementary material for: T-complex protein 1 subunit zeta-2 (CCT6B) deficiency induces murine teratospermia
Source: PeerJ. 2021 Jun 1;9:e11545. doi: 10.7717/peerj.11545 (PMC8176918; doi:10.7717/peerj.11545)
Supplement: Supplemental Information 12 [file peerj-09-11545-s012.xlsx]

## Sheet: Sheet1
	BW	TW	T/B	AVERAGE	SD	P value
Cct6b+/+-1	27.4	0.09045	0.00330109	0.00298694	0.000432155	0.612193
Cct6b+/+-2	30.86	0.10134	0.00328386
Cct6b+/+-3	42.09	0.1	0.00237586
Cct6b-/--1	29.25	0.1066	0.00364444	0.00326377	0.000567187
Cct6b-/--2	30.21	0.11132	0.00368487
Cct6b-/--3	38.01	0.09358	0.00246198
