# Supplementary material for: T-complex protein 1 subunit zeta-2 (CCT6B) deficiency induces murine teratospermia
Source: PeerJ. 2021 Jun 1;9:e11545. doi: 10.7717/peerj.11545 (PMC8176918; doi:10.7717/peerj.11545)
Supplement: Supplemental Information 14 [file peerj-09-11545-s014.xlsx]

## Sheet: Stage VIII
	Spermatogonia Count			Spermatogonia Count
Cct6b-/-1-1	1		Cct6b+/+1-1	9		P value	0.646773
Cct6b-/-1-2	4		Cct6b+/+1-2	2
Cct6b-/-1-3	4		Cct6b+/+1-3	5
Cct6b-/-1-4	4		Cct6b+/+1-4	4
			Cct6b+/+1-5	1
Cct6b-/-2-1	5		Cct6b+/+2-1	4
Cct6b-/-2-2	8		Cct6b+/+2-2	3
Cct6b-/-2-3	2		Cct6b+/+2-3	4
Cct6b-/-2-4	5		Cct6b+/+2-4	5
Cct6b-/-2-5	2		Cct6b+/+2-5	2
Cct6b-/-2-6	9		Cct6b+/+2-6	9
Cct6b-/-2-7	5		Cct6b+/+2-7	3
Cct6b-/-2-8	5		Cct6b+/+2-8	10
Cct6b-/-2-9	5		Cct6b+/+2-9	4
Cct6b-/-2-10	6		Cct6b+/+2-10	3
Cct6b-/-3-1	7		Cct6b+/+3-1	4
Cct6b-/-3-2	7		Cct6b+/+3-2	4
Cct6b-/-3-3	6		Cct6b+/+3-3	4
Cct6b-/-3-4	6		Cct6b+/+3-4	8
Cct6b-/-3-5	2		Cct6b+/+3-5	11
Cct6b-/-3-6	6		Cct6b+/+3-6	4
Cct6b-/-3-7	2		Cct6b+/+3-7	3
Cct6b-/-3-8	4		Cct6b+/+3-8	4
Cct6b-/-3-9	7		Cct6b+/+3-9	4
Cct6b-/-3-10	7		Cct6b+/+3-10	8
Cct6b-/-3-11	2		Cct6b+/+3-11	5
Cct6b-/-3-12	6		Cct6b+/+3-12	4
Cct6b-/-3-13	3		Cct6b+/+3-13	5
Cct6b-/-3-14	3		Cct6b+/+3-14	8
Cct6b-/-3-15	2		Cct6b+/+3-15	4
