# Supplementary material for: T-complex protein 1 subunit zeta-2 (CCT6B) deficiency induces murine teratospermia
Source: PeerJ. 2021 Jun 1;9:e11545. doi: 10.7717/peerj.11545 (PMC8176918; doi:10.7717/peerj.11545)
Supplement: Supplemental Information 15 [file peerj-09-11545-s015.xlsx]

## Sheet: Stage VIII
	Sertoli Count			Sertoli Count
Cct6b-/-1-1	18		Cct6b+/+1-1	16		P value	0.918675
Cct6b-/-1-2	15		Cct6b+/+1-2	14
Cct6b-/-1-3	10		Cct6b+/+1-3	15
Cct6b-/-1-4	15		Cct6b+/+1-4	11
Cct6b-/-1-5	18		Cct6b+/+1-5	17
			Cct6b+/+1-6	15
Cct6b-/-2-1	16		Cct6b+/+2-1	13
Cct6b-/-2-2	17		Cct6b+/+2-2	16
Cct6b-/-2-3	9		Cct6b+/+2-3	12
Cct6b-/-2-4	13		Cct6b+/+2-4	20
Cct6b-/-2-5	15		Cct6b+/+2-5	13
Cct6b-/-3-1	16		Cct6b+/+3-1	22
Cct6b-/-3-2	22		Cct6b+/+3-2	11
Cct6b-/-3-3	9		Cct6b+/+3-3	15
Cct6b-/-3-4	15		Cct6b+/+3-4	14
Cct6b-/-3-5	13		Cct6b+/+3-5	13
Cct6b-/-3-6	10		Cct6b+/+3-6	19
Cct6b-/-3-7	13		Cct6b+/+3-7	12
Cct6b-/-3-8	11		Cct6b+/+3-8	9
Cct6b-/-3-9	20		Cct6b+/+3-9	16
Cct6b-/-3-10	13		Cct6b+/+3-10	11
Cct6b-/-3-11	14		Cct6b+/+3-11	11
Cct6b-/-3-12	12		Cct6b+/+3-12	16
Cct6b-/-3-13	14		Cct6b+/+3-13	17
Cct6b-/-3-14	17		Cct6b+/+3-14	9
Cct6b-/-3-15	12		Cct6b+/+3-15	17
