# Supplementary material for: T-complex protein 1 subunit zeta-2 (CCT6B) deficiency induces murine teratospermia
Source: PeerJ. 2021 Jun 1;9:e11545. doi: 10.7717/peerj.11545 (PMC8176918; doi:10.7717/peerj.11545)
Supplement: Supplemental Information 17 [file peerj-09-11545-s017.xlsx]

## Sheet: Sheet1
	Total	Nomal	%	Head Abnomal	%	Tail Abnomal	%
Cct6b+/+-1	212	179	84.434	15	7.07547	18	8.49057
Cct6b+/+-2	222	198	89.1892	8	3.6036	16	7.20721
Cct6b+/+-3	216	184	85.1852	16	7.40741	16	7.40741
Cct6b-/--1	206	110	53.3981	14	6.79612	82	39.8058
Cct6b-/--2	257	165	64.2023	18	7.00389	74	28.7938
Cct6b-/--3	224	152	67.8571	13	5.80357	59	26.3393
P value			0.00595355		0.711155		0.00451843
