# Supplementary material for: T-complex protein 1 subunit zeta-2 (CCT6B) deficiency induces murine teratospermia
Source: PeerJ. 2021 Jun 1;9:e11545. doi: 10.7717/peerj.11545 (PMC8176918; doi:10.7717/peerj.11545)
Supplement: Supplemental Information 18 [file peerj-09-11545-s018.xlsx]

## Sheet: Sheet1
		Ct	Ct	△Ct	2^△Ct	P value
		Cct1	18s
Cct6b-/--1	cct1	17.2038	7.97759	-9.22623	0.00166966	0.114254
Cct6b-/--1	cct1	17.0258	7.96779	-9.05797	0.0018762
Cct6b-/--2	cct1	17.2239	7.98552	-9.23839	0.00165565
Cct6b-/--2	cct1	16.9834	7.9557	-9.02774	0.00191592
Cct6b-/--2	cct1	17.0664	7.8871	-9.1793	0.00172487
Cct6b-/--3	cct1	16.6717	8.17873	-8.49302	0.00277554
Cct6b-/--3	cct1	16.4729	8.0888	-8.38406	0.00299327
Cct6b-/--3	cct1	16.4152	8.15012	-8.26509	0.00325058
Cct6b+/+-1	cct1	16.6503	7.88122	-8.76912	0.00229209
Cct6b+/+-1	cct1	16.6511	7.91353	-8.73756	0.00234278
Cct6b+/+-2	cct1	16.6263	7.7975	-8.82876	0.00219927
Cct6b+/+-2	cct1	16.6296	7.7707	-8.85886	0.00215386
Cct6b+/+-2	cct1	16.709	7.8701	-8.83894	0.0021838
Cct6b+/+-3	cct1	16.3748	8.02115	-8.35368	0.00305697
Cct6b+/+-3	cct1	16.1955	7.99641	-8.19906	0.0034028
Cct6b+/+-3	cct1	16.2748	8.0055	-8.26933	0.00324103
		Ct	Ct	△Ct	2^△Ct	P value
		Cct2	18s
Cct6b-/--1	cct2	28.7428	7.97759	-20.7652	5.6113e-07	0.0612052
Cct6b-/--1	cct2	28.8778	7.96779	-20.91	5.07525e-07
Cct6b-/--2	cct2	28.5102	7.98552	-20.5247	6.629e-07
Cct6b-/--2	cct2	28.7094	7.9557	-20.7537	5.65618e-07
Cct6b-/--2	cct2	28.717	7.8871	-20.8299	5.365e-07
Cct6b-/--3	cct2	28.1164	8.17873	-19.9377	9.95752e-07
Cct6b-/--3	cct2	27.897	8.0888	-19.8082	1.08924e-06
Cct6b-/--3	cct2	27.961	8.15012	-19.8109	1.08723e-06
Cct6b+/+-1	cct2	27.9762	7.88122	-20.095	8.92898e-07
Cct6b+/+-1	cct2	28.1328	7.91353	-20.2193	8.19212e-07
Cct6b+/+-2	cct2	28.2015	7.7975	-20.404	7.20761e-07
Cct6b+/+-2	cct2	28.133	7.7707	-20.3623	7.41863e-07
Cct6b+/+-2	cct2	28.1356	7.8701	-20.2655	7.9338e-07
Cct6b+/+-3	cct2	27.6873	8.02115	-19.6662	1.20196e-06
Cct6b+/+-3	cct2	27.6625	7.99641	-19.6661	1.202e-06
Cct6b+/+-3	cct2	27.6573	8.0055	-19.6518	1.214e-06
		Ct	Ct	△Ct	2^△Ct	P value
		Cct3	18s
Cct6b-/--1	cct3	18.9412	7.97759	-10.9636	0.000500743	0.204154
Cct6b-/--1	cct3	18.8947	7.96779	-10.9269	0.000513658
Cct6b-/--2	cct3	18.6528	7.98552	-10.6673	0.00061492
Cct6b-/--2	cct3	18.5985	7.9557	-10.6428	0.000625465
Cct6b-/--2	cct3	18.6845	7.8871	-10.7974	0.000561908
Cct6b-/--3	cct3	19.1582	8.17873	-10.9795	0.000495271
Cct6b-/--3	cct3	19.095	8.0888	-11.0062	0.000486196
Cct6b-/--3	cct3	19.2006	8.15012	-11.0505	0.000471489
Cct6b+/+-1	cct3	18.5381	7.88122	-10.6569	0.000619375
Cct6b+/+-1	cct3	19.6591	7.91353	-11.7456	0.000291223
Cct6b+/+-2	cct3	19.3811	7.7975	-11.5836	0.000325837
Cct6b+/+-2	cct3	18.2497	7.7707	-10.479	0.000700676
Cct6b+/+-2	cct3	18.338	7.8701	-10.4679	0.000706066
Cct6b+/+-3	cct3	20.3006	8.02115	-12.2795	0.000201145
Cct6b+/+-3	cct3	18.9527	7.99641	-10.9563	0.000503299
Cct6b+/+-3	cct3	19.1657	8.0055	-11.1602	0.000436966
		Ct	Ct	△Ct	2^△Ct	P value
		Cct4	18s
Cct6b-/--1	cct4	20.2106	7.97759	-12.233	0.000207734	0.0277484
Cct6b-/--1	cct4	20.3184	7.96779	-12.3506	0.000191468
Cct6b-/--2	cct4	20.2687	7.98552	-12.2832	0.000200632
Cct6b-/--2	cct4	20.3953	7.9557	-12.4396	0.00018001
Cct6b-/--2	cct4	20.2156	7.8871	-12.3285	0.000194431
Cct6b-/--3	cct4	20.2056	8.17873	-12.0269	0.000239629
Cct6b-/--3	cct4	20.3294	8.0888	-12.2406	0.000206636
Cct6b-/--3	cct4	20.2554	8.15012	-12.1053	0.000226958
Cct6b+/+-1	cct4	19.8479	7.88122	-11.9667	0.000249841
Cct6b+/+-1	cct4	19.9245	7.91353	-12.0109	0.000242298
Cct6b+/+-2	cct4	19.8906	7.7975	-12.0931	0.000228889
Cct6b+/+-2	cct4	19.8783	7.7707	-12.1076	0.00022659
Cct6b+/+-2	cct4	19.8884	7.8701	-12.0183	0.000241067
Cct6b+/+-3	cct4	20.2711	8.02115	-12.2499	0.000205308
Cct6b+/+-3	cct4	20.2277	7.99641	-12.2313	0.000207975
Cct6b+/+-3	cct4	20.2718	8.0055	-12.2663	0.000202994
		Ct	Ct	△Ct	2^△Ct	P value
		Cct5	18s
Cct6b-/--1	cct5	19.4892	7.97759	-11.5116	0.000342501	0.146783
Cct6b-/--1	cct5	19.6146	7.96779	-11.6468	0.000311867
Cct6b-/--2	cct5	19.2995	7.98552	-11.314	0.000392771
Cct6b-/--2	cct5	19.4345	7.9557	-11.4788	0.00035037
Cct6b-/--2	cct5	19.328	7.8871	-11.4409	0.000359707
Cct6b-/--3	cct5	19.6794	8.17873	-11.5007	0.000345104
Cct6b-/--3	cct5	18.8233	8.0888	-10.7345	0.000586956
Cct6b-/--3	cct5	19.7304	8.15012	-11.5803	0.000326582
Cct6b+/+-1	cct5	18.9924	7.88122	-11.1111	0.00045208
Cct6b+/+-1	cct5	19.0093	7.91353	-11.0958	0.000456916
Cct6b+/+-2	cct5	18.8719	7.7975	-11.0744	0.000463747
Cct6b+/+-2	cct5	18.8367	7.7707	-11.066	0.000466434
Cct6b+/+-2	cct5	18.8947	7.8701	-11.0246	0.000480013
Cct6b+/+-3	cct5	19.5657	8.02115	-11.5446	0.000334766
Cct6b+/+-3	cct5	19.5096	7.99641	-11.5132	0.000342117
Cct6b+/+-3	cct5	19.4695	8.0055	-11.464	0.000354
		Ct	Ct	△Ct	2^△Ct	P value
		Cct6a	18s
Cct6b-/--1	cct6a	20.2008	7.97759	-12.2232	0.000209142	0.363598
Cct6b-/--1	cct6a	20.0094	7.96779	-12.0416	0.000237198
Cct6b-/--2	cct6a	20.1125	7.98552	-12.127	0.00022357
Cct6b-/--2	cct6a	20.0689	7.9557	-12.1132	0.000225715
Cct6b-/--2	cct6a	20.0674	7.8871	-12.1803	0.000215465
Cct6b-/--3	cct6a	20.0956	8.17873	-11.9169	0.000258625
Cct6b-/--3	cct6a	19.9821	8.0888	-11.8933	0.000262885
Cct6b-/--3	cct6a	20.2117	8.15012	-12.0616	0.000233942
Cct6b+/+-1	cct6a	19.9828	7.88122	-12.1016	0.000227545
Cct6b+/+-1	cct6a	19.9333	7.91353	-12.0198	0.000240818
Cct6b+/+-2	cct6a	19.8062	7.7975	-12.0087	0.000242669
Cct6b+/+-2	cct6a	19.8393	7.7707	-12.0686	0.000232807
Cct6b+/+-2	cct6a	19.8447	7.8701	-11.9746	0.000248485
Cct6b+/+-3	cct6a	20.0654	8.02115	-12.0443	0.000236759
Cct6b+/+-3	cct6a	20.1492	7.99641	-12.1528	0.000219603
Cct6b+/+-3	cct6a	20.0345	8.0055	-12.029	0.000239286
		Ct	Ct	△Ct	2^△Ct	P value
		Cct7	18s
Cct6b-/--1	cct7	22.5118	7.97759	-14.5342	4.21483e-05	0.0475713
Cct6b-/--1	cct7	22.3389	7.96779	-14.3712	4.71903e-05
Cct6b-/--2	cct7	22.3695	7.98552	-14.384	4.67721e-05
Cct6b-/--2	cct7	22.4129	7.9557	-14.4572	4.44567e-05
Cct6b-/--2	cct7	22.1245	7.8871	-14.2374	5.1776e-05
Cct6b-/--3	cct7	22.5575	8.17873	-14.3787	4.69425e-05
Cct6b-/--3	cct7	22.4037	8.0888	-14.3149	4.90674e-05
Cct6b-/--3	cct7	21.9977	8.15012	-13.8475	6.7838e-05
Cct6b+/+-1	cct7	21.5667	7.88122	-13.6855	7.59043e-05
Cct6b+/+-1	cct7	21.8649	7.91353	-13.9513	6.31294e-05
Cct6b+/+-2	cct7	21.7746	7.7975	-13.9771	6.20101e-05
Cct6b+/+-2	cct7	21.9267	7.7707	-14.156	5.47814e-05
Cct6b+/+-2	cct7	22.1268	7.8701	-14.2567	5.10877e-05
Cct6b+/+-3	cct7	22.3554	8.02115	-14.3343	4.84125e-05
Cct6b+/+-3	cct7	22.193	7.99641	-14.1966	5.32592e-05
Cct6b+/+-3	cct7	22.3093	8.0055	-14.3038	4.94464e-05
		Ct	Ct	△Ct	2^△Ct	P value
		Cct8	18s
Cct6b-/--1	cct8	22.3948	7.97759	-14.4172	4.5709e-05	0.43433
Cct6b-/--1	cct8	22.2965	7.96779	-14.3287	4.86004e-05
Cct6b-/--2	cct8	22.4714	7.98552	-14.4859	4.35826e-05
Cct6b-/--2	cct8	22.0711	7.9557	-14.1154	5.63421e-05
Cct6b-/--2	cct8	21.861	7.8871	-13.9738	6.21516e-05
Cct6b-/--3	cct8	21.3548	8.17873	-13.176	0.000108049
Cct6b-/--3	cct8	21.0687	8.0888	-12.9799	0.00012378
Cct6b-/--3	cct8	20.9793	8.15012	-12.8292	0.000137413
Cct6b+/+-1	cct8	21.8761	7.88122	-13.9949	6.1252e-05
Cct6b+/+-1	cct8	22.2972	7.91353	-14.3836	4.67836e-05
Cct6b+/+-2	cct8	21.689	7.7975	-13.8915	6.58016e-05
Cct6b+/+-2	cct8	21.5714	7.7707	-13.8007	7.00793e-05
Cct6b+/+-2	cct8	21.6227	7.8701	-13.7526	7.24537e-05
Cct6b+/+-3	cct8	21.1704	8.02115	-13.1493	0.00011007
Cct6b+/+-3	cct8	21.0857	7.99641	-13.0892	0.000114748
Cct6b+/+-3	cct8	21.2029	8.0055	-13.1974	0.000106458
